# Supplementary material for: SnO 2 quantum dot decoration of CuO nanoparticles with enhanced NO 2 and H 2 gas sensing response via p–n heterojunction interfaces
Source: Royal Society of Chemistry journal article supplement (doi:10.1039/d5ra05533d), 2025-01-01
Supplement: d5ra05533d1.pdf [file d5ra05533d1.pdf]

## SUPPORTING INFORMATION

### **SnO<sub>2</sub> quantum dots decoration of CuO nanoparticles with enhanced NO<sub>2</sub> and H<sub>2</sub> gas sensing response via *p-n* heterojunction interfaces**

Valentina Paolucci<sup>1</sup>, Thirugnanam Natarajan<sup>1</sup>, Vittorio Ricci<sup>1</sup>, Fabiola Ferrante<sup>1</sup>, Carlo Cantalini<sup>1</sup>

<sup>1</sup>*Department of Industrial and Information Engineering and Economics, University of L'Aquila, I-67100 L'Aquila, Italy*

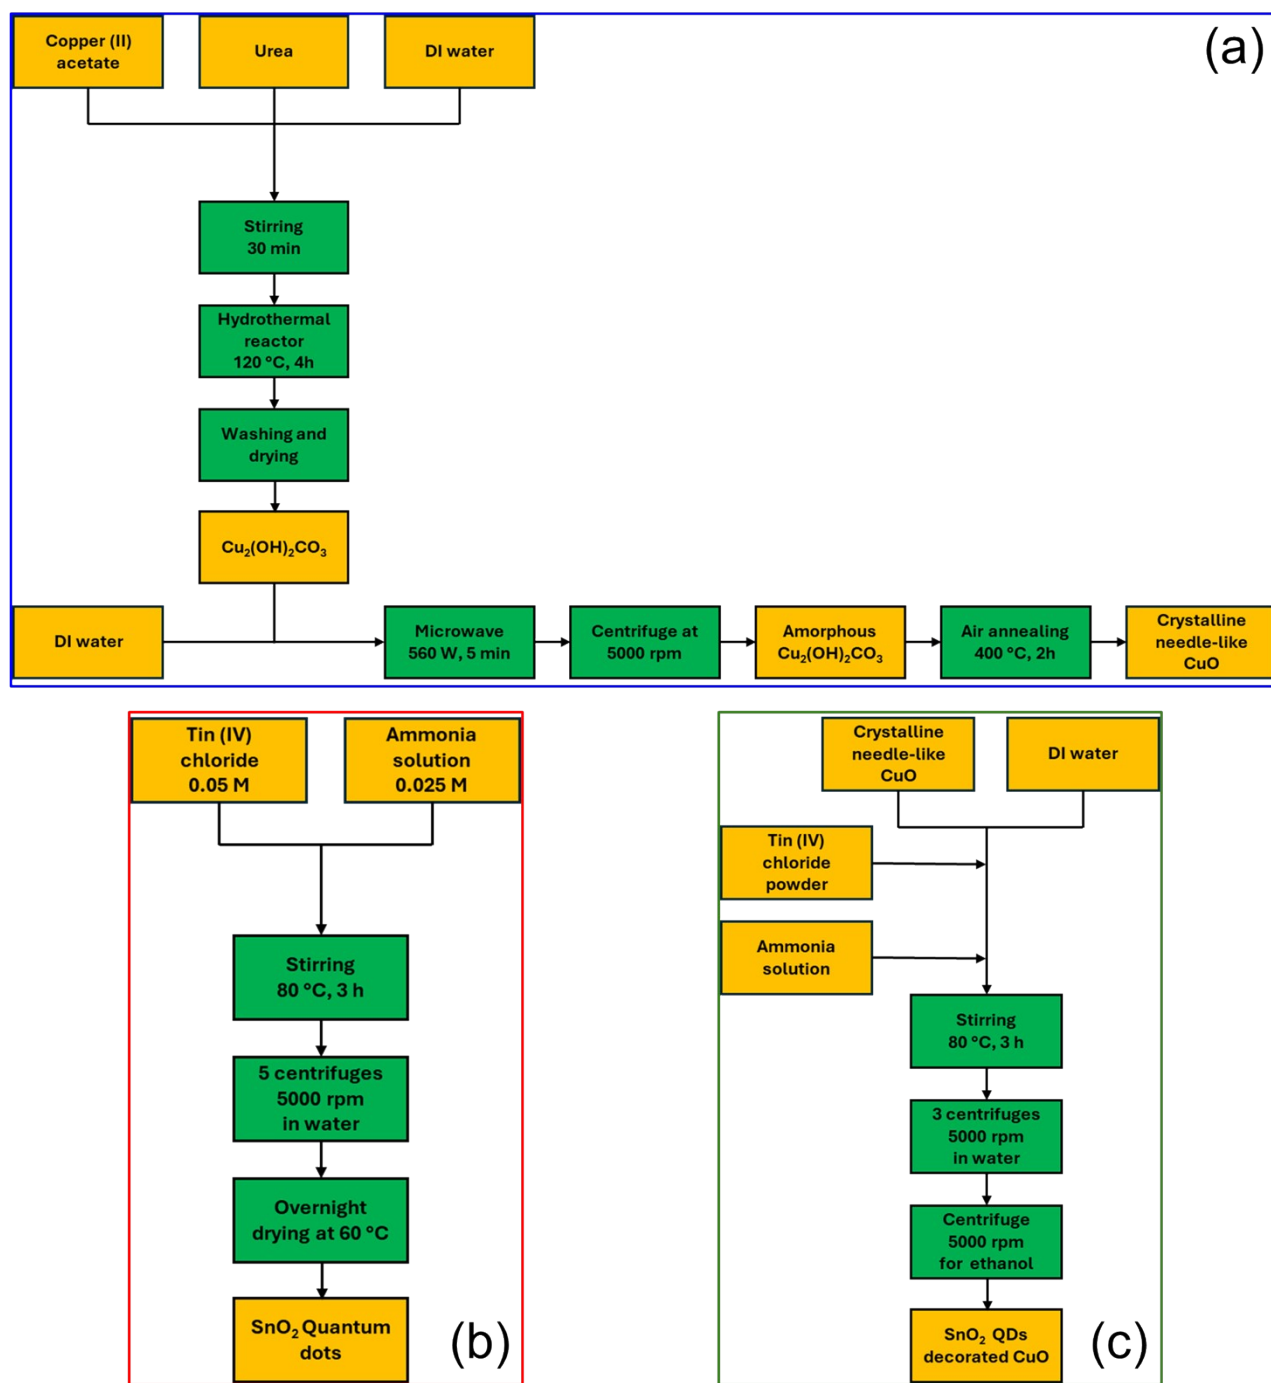

**Figure S1.** Flowcharts of the synthesis processes of: (a) Needle-like CuO nanoparticles; (b) SnO<sub>2</sub> quantum dots; (c) SnO<sub>2</sub> quantum dots-decorated CuO.

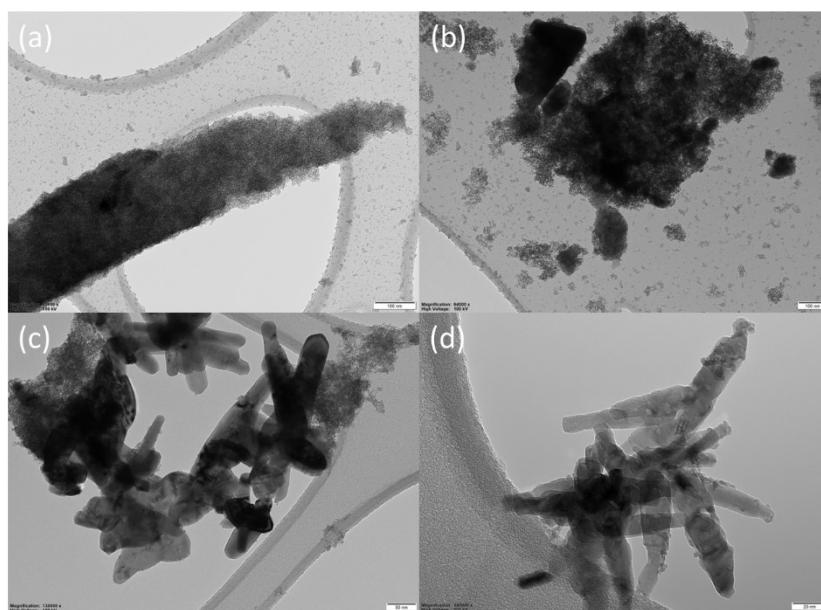

**Figure S2.** Optimization of the synthesis procedure. (a,b) Equimolar CuO and SnCl<sub>4</sub>: SnO<sub>2</sub> QDs formed agglomerated clusters homogeneously dispersed in solution, with no preferential anchoring to CuO. (c) Reduced Sn precursor concentration: partial improvement in the flakes/dots ratio, although nucleation is still independent of CuO. (d) Optimized route: addition of SnCl<sub>4</sub> directly to the CuO dispersion, followed by ammonia, yielding selective nucleation on CuO and the desired decoration with SnO<sub>2</sub> dots.

The synthesis was first attempted by combining equimolar amounts of CuO and SnCl<sub>4</sub>. In this case, SnCl<sub>4</sub> was initially dissolved in the 0.05 M ammonia solution and then mixed with the CuO dispersion (**Figure S1a-b**). The resulting SnO<sub>2</sub> quantum dots were agglomerated and these clusters homogeneously dispersed in substrate, rather than anchored to CuO, showing that nucleation occurred independently of the CuO surface. In addition, the amount of SnCl<sub>4</sub> used was found to be excessive. A second trial (**Figure S1c**), performed by reducing the Sn precursor concentration (1:10 as respect to CuO), led to a partial improvement in the flakes/dots ratio, although nucleation was still not correlated with CuO. The final optimization step was achieved by modifying the order of reagent addition: SnCl<sub>4</sub> (2.6 mg) was introduced directly into the CuO dispersion (25 mg in 20 ml DI water), and ammonia was added only afterwards. This simple adjustment successfully directed nucleation onto the CuO surface, leading to controlled decoration rather than uncontrolled nucleation in solution, therefore yielding the desired SnO<sub>2</sub> decoration (**Figure S1d**).

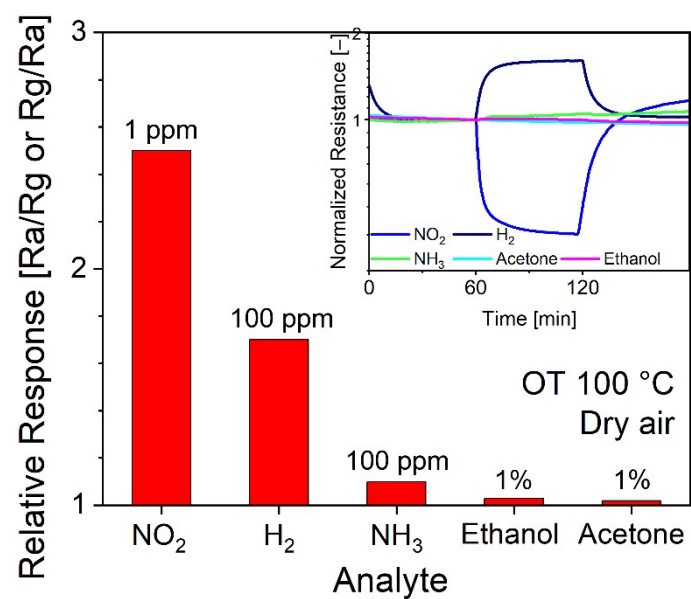

**Figure S3.** Selectivity responses to different concentrations of various gases and vapours (NO<sub>2</sub>, H<sub>2</sub>, NH<sub>3</sub>, Ethanol and Acetone) measured at 100°C OT and dry air atmosphere.
